# Supplementary material for: DeepGANnel: Synthesis of fully annotated single molecule patch-clamp data using generative adversarial networks
Source: PubMed Central journal article supplement (PMC9089889; doi:10.1371/journal.pone.0267452), 2022-05-10
Supplement: pone.0267452.s003.pdf [file pone.0267452.s003.pdf]

|                          |         |                   |
|--------------------------|---------|-------------------|
| conv2d_input: InputLayer | input:  | [(?, 2, 4096, 1)] |
|                          | output: | [(?, 2, 4096, 1)] |

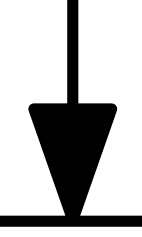

|                |         |                  |
|----------------|---------|------------------|
| conv2d: Conv2D | input:  | (?, 2, 4096, 1)  |
|                | output: | (?, 2, 2048, 32) |

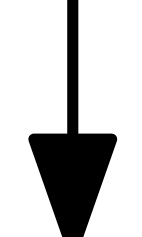

|                          |         |                  |
|--------------------------|---------|------------------|
| leaky_re_lu_9: LeakyReLU | input:  | (?, 2, 2048, 32) |
|                          | output: | (?, 2, 2048, 32) |

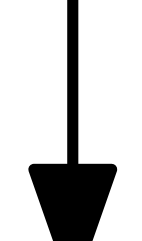

|                  |         |                  |
|------------------|---------|------------------|
| dropout: Dropout | input:  | (?, 2, 2048, 32) |
|                  | output: | (?, 2, 2048, 32) |

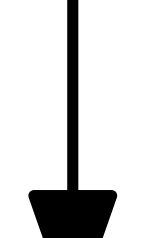

|                  |         |                  |
|------------------|---------|------------------|
| conv2d_1: Conv2D | input:  | (?, 2, 2048, 32) |
|                  | output: | (?, 2, 1024, 64) |

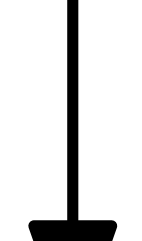

|                           |         |                  |
|---------------------------|---------|------------------|
| leaky_re_lu_10: LeakyReLU | input:  | (?, 2, 1024, 64) |
|                           | output: | (?, 2, 1024, 64) |

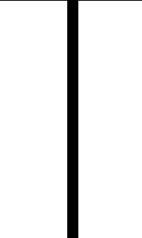

|                    |         |                  |
|--------------------|---------|------------------|
| dropout_1: Dropout | input:  | (?, 2, 1024, 64) |
|                    | output: | (?, 2, 1024, 64) |

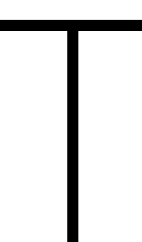

|                  |         |                  |
|------------------|---------|------------------|
| conv2d_2: Conv2D | input:  | (?, 2, 1024, 64) |
|                  | output: | (?, 2, 512, 64)  |

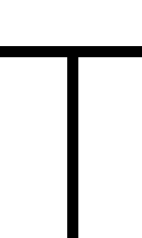

|                           |         |                 |
|---------------------------|---------|-----------------|
| leaky_re_lu_11: LeakyReLU | input:  | (?, 2, 512, 64) |
|                           | output: | (?, 2, 512, 64) |

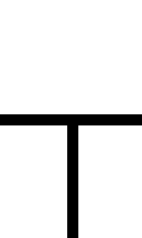

|                    |         |                 |
|--------------------|---------|-----------------|
| dropout_2: Dropout | input:  | (?, 2, 512, 64) |
|                    | output: | (?, 2, 512, 64) |

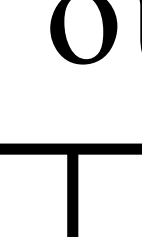

|                  |         |                 |
|------------------|---------|-----------------|
| conv2d_3: Conv2D | input:  | (?, 2, 512, 64) |
|                  | output: | (?, 2, 256, 64) |

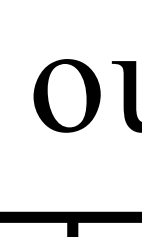

|                           |         |                 |
|---------------------------|---------|-----------------|
| leaky_re_lu_12: LeakyReLU | input:  | (?, 2, 256, 64) |
|                           | output: | (?, 2, 256, 64) |

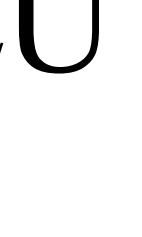

|                    |         |                 |
|--------------------|---------|-----------------|
| dropout_3: Dropout | input:  | (?, 2, 256, 64) |
|                    | output: | (?, 2, 256, 64) |

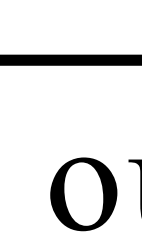

|                  |         |                  |
|------------------|---------|------------------|
| conv2d_4: Conv2D | input:  | (?, 2, 256, 64)  |
|                  | output: | (?, 2, 128, 128) |

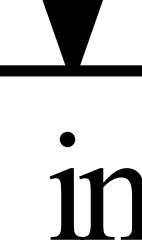

|                           |         |                  |
|---------------------------|---------|------------------|
| leaky_re_lu_13: LeakyReLU | input:  | (?, 2, 128, 128) |
|                           | output: | (?, 2, 128, 128) |

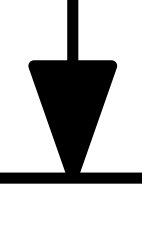

|                    |         |                  |
|--------------------|---------|------------------|
| dropout_4: Dropout | input:  | (?, 2, 128, 128) |
|                    | output: | (?, 2, 128, 128) |

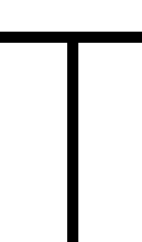

|                  |         |                  |
|------------------|---------|------------------|
| conv2d_5: Conv2D | input:  | (?, 2, 128, 128) |
|                  | output: | (?, 2, 64, 256)  |

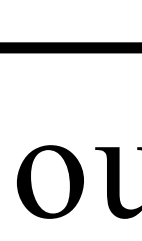

|                           |         |                 |
|---------------------------|---------|-----------------|
| leaky_re_lu_14: LeakyReLU | input:  | (?, 2, 64, 256) |
|                           | output: | (?, 2, 64, 256) |

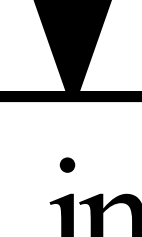

|                    |         |                 |
|--------------------|---------|-----------------|
| dropout_5: Dropout | input:  | (?, 2, 64, 256) |
|                    | output: | (?, 2, 64, 256) |

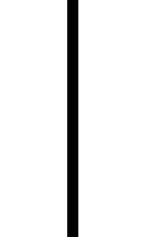

|                  |         |                 |
|------------------|---------|-----------------|
| flatten: Flatten | input:  | (?, 2, 64, 256) |
|                  | output: | (?, 32768)      |

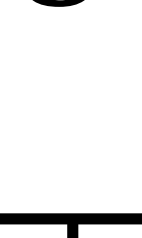

|                |         |            |
|----------------|---------|------------|
| dense_1: Dense | input:  | (?, 32768) |
|                | output: | (?, 1)     |
